# Supplementary material for: Caregiver’s Opinions on the Design of the Screens of a Future Gamified Mobile Application for Self-Management of Type 1 Diabetes in Children in Saudi Arabia
Source: Hindawi journal article supplement (doi:10.1155/2021/8822676), 2021-02-04
Supplement: f1 [file 8822676.f1.pdf]

# Guardian's Perspective Towards Designing a Mobile Application for T1 Diabetic Children

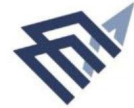

جامعة الإمام عبد الرحمن بن فيصل  
IMAM ABDULRAHMAN BIN FAISAL UNIVERSITY

## Demographic Information of Guardian

1\* Age:

Less than 20

21-30

31-40

41-50

51-60

61-70

Other (Please Specify)

2\* Gender:

Male

Female

3\* Level of education:

Primary

Secondary

High school

College degree

Other (Please Specify)

4\* what is your kinship relation with the diabetic child:

Mother

Father

Siblings

Other (Please Specify)

# Demographic Information of the Diabetic Child

5\* When your child was diagnosed with diabetes:

<1year

1-3 Year

4-6 Year

Other (Please Specify):

6\* How old is your diabetic child:

7-8 Year

9-10 Year

11-12 Year

7\* What is the gender of your diabetic child:

Male

Female

## Mobile Application Information

8\* In your opinion, how much your diabetic child would benefit from an application that is designed to manage his/her condition:

0 1 2 3 4 5 6 7 8 9 10  
Less helpful More helpful

9\* In your opinion, what's the most appropriate design of the game for your diabetic child:

Questions & Answer

Runner game

Taking care of a character

Stories

Other (Please Specify)

**10\*** In your opinion, what's the most appropriate rewarding style that shall be used in the game for your diabetic child:

Points

Levels

Leaderboards

Other (Please Specify)

**11** What are the features that you would like to have in the game for your diabetic child:

Reminders and notifications

Social interaction

Friends challenges

Other (Please Specify)

**12** What are the most behaviors that you struggle to change of your child to manage his\her condition:

Physical activities

Managing the medications

Nutrition problems

Monitoring the blood glucose level

Other (Please Specify):

**13** Any additional comment:

---

Thank You For Completing This Survey
